# Supplementary material
Source: publisher figshare collection journal article supplement (https://diabetesjournals.figshare.com/articles/dataset/_/13259723)
Supplement: Supplementary file 5 [file 2]

## Checklist for Reporting Human Islet Preparations Used in Research

Adapted from Hart NJ, Powers AC (2018) Progress, challenges, and suggestions for using human islets to understand islet biology and human diabetes. Diabetologia <https://doi.org/10.1007/s00125-018-4772-2>.

|                                                                                                                                                                                                                                                                              |                                                 |
|------------------------------------------------------------------------------------------------------------------------------------------------------------------------------------------------------------------------------------------------------------------------------|-------------------------------------------------|
| <b>Manuscript DOI:</b> <a href="https://doi.org/10.2337/[insert manuscript submission number]">https://doi.org/10.2337/[insert manuscript submission number]</a> (Example, <a href="https://doi.org/10.2337/db18-1234">https://doi.org/10.2337/db18-1234</a> )               |                                                 |
| <b>Title:</b> Loss of furin in $\beta$ cells induces an mTORC1-ATF4 anabolic pathway that leads to $\beta$ cell dysfunction                                                                                                                                                  |                                                 |
| <b>Author list:</b> Bas Brouwers, Ilaria Coppola, Katlijn Vints, Bastian Dislich, Nathalie Jouvét, Leentje Van Lommel, Natalia V. Gounko, Lieven Thorrez, Frans Schuit, Stefan F. Lichtenthaler, Jennifer L. Estall, Jeroen Declercq, Bruno Ramos-Molina, John W.M. Creemers |                                                 |
| <b>Corresponding author:</b> John W.M. Creemers                                                                                                                                                                                                                              | <b>Email address:</b> john.creemers@kuleuven.be |

| Islet preparation              | 1    | 2    | 3    | 4    | 5    | 6    | 7    | 8 <sup>a</sup> |
|--------------------------------|------|------|------|------|------|------|------|----------------|
| MANDATORY INFORMATION          |      |      |      |      |      |      |      |                |
| Unique identifier              | R213 | R231 | R240 | R244 | R259 | R262 | R263 | SAMN15942269   |
| Donor age (years)              | 57   | 41   | 55   | 48   | 45   | 54   | 71   | 63             |
| Donor sex (M/F)                | M    | F    | F    | F    | F    | F    | M    | F              |
| Donor BMI (kg/m <sup>2</sup> ) | 23.1 | 37.1 | 30.9 | 30.4 | 33.1 | 22.4 | 38.2 | 26.9           |

|                                                                             |                                                               |                                                               |                                                               |                                                               |                                                               |                                                                                                         |                                                               |                                                |
|-----------------------------------------------------------------------------|---------------------------------------------------------------|---------------------------------------------------------------|---------------------------------------------------------------|---------------------------------------------------------------|---------------------------------------------------------------|---------------------------------------------------------------------------------------------------------|---------------------------------------------------------------|------------------------------------------------|
| Donor HbA <sub>1c</sub> or other measure of blood glucose control           | 6.7                                                           | 6.8                                                           | 6.9                                                           | 7.5                                                           | 6.4                                                           | 5.6                                                                                                     | 7.6                                                           | 5.5                                            |
| Origin/source of islets <sup>b</sup>                                        | Alberta Islet Core                                                                                      | Alberta Islet Core                                            | IDP                                            |
| Islet isolation centre                                                      | Alberta Diabetes Institute Islet Core (University of Alberta) | Alberta Diabetes Institute Islet Core (University of Alberta) | Alberta Diabetes Institute Islet Core (University of Alberta) | Alberta Diabetes Institute Islet Core (University of Alberta) | Alberta Diabetes Institute Islet Core (University of Alberta) | Alberta Diabetes Institute Islet Core (University of Alberta)                                           | Alberta Diabetes Institute Islet Core (University of Alberta) | Southern California Islet Cell Resource Center |
| Donor history of diabetes? Yes/No                                           | Yes                                                           | Yes                                                           | Yes                                                           | Yes                                                           | Yes                                                           | Yes                                                                                                     | Yes                                                           | No                                             |
| <b>If Yes, complete the next two lines if this information is available</b> |                                                               |                                                               |                                                               |                                                               |                                                               |                                                                                                         |                                                               |                                                |
| Diabetes duration (years)                                                   | 22                                                            | 0.5                                                           | 2                                                             | 3                                                             | 4                                                             | unknown                                                                                                 | 9                                                             | N/A                                            |
| Glucose-lowering therapy at time of death <sup>c</sup>                      | Metformin                                                     | None                                                          | Diet controlled                                               | Oral medications: Glifage (Metformin?) XR 500mg OD (500mgx3)  | Oral meds only – no insulin                                   | Metformin – Was on insulin 2 years ago but due to weight loss (30 pounds) was described Metformin only. | Metformin                                                     |                                                |

| RECOMMENDED INFORMATION |                                     |                                     |                                     |                                     |                                     |                                     |                                     |                        |
|-------------------------|-------------------------------------|-------------------------------------|-------------------------------------|-------------------------------------|-------------------------------------|-------------------------------------|-------------------------------------|------------------------|
| Donor cause of death    | Neurological Determination of Death | Neurological Determination of Death | Neurological Determination of Death | Neurological Determination of Death | Neurological Determination of Death | Neurological Determination of Death | Neurological Determination of Death | Cerebrovascular/Stroke |

|                                                                                   |     |     |     |      |     |     |     |     |
|-----------------------------------------------------------------------------------|-----|-----|-----|------|-----|-----|-----|-----|
| Warm ischaemia time (h)                                                           |     |     |     |      |     |     |     |     |
| Cold ischaemia time (h)                                                           | 16  | 18  | 13  | 11.5 | 12  | 3   | 20  | 5.0 |
| Estimated purity (%)                                                              | 50  | 50  | 50  | 70   | 70  | 75  | 75  | 80  |
| Estimated viability (%)                                                           |     |     |     |      |     |     |     |     |
| Total culture time (h) <sup>d</sup>                                               |     |     |     |      |     |     |     |     |
| Glucose-stimulated insulin secretion or other functional measurement <sup>e</sup> |     |     |     |      |     |     |     |     |
| Handpicked to purity? Yes/No                                                      | Yes | Yes | Yes | Yes  | Yes | Yes | Yes | Yes |
| Additional notes                                                                  |     |     |     |      |     |     |     |     |

<sup>a</sup>If you have used more than eight islet preparations, please complete additional forms as necessary

<sup>b</sup>For example, IIDP, ECIT, Alberta IsletCore

<sup>c</sup>Please specify the therapy/therapies

<sup>d</sup>Time of islet culture at the isolation centre, during shipment and at the receiving laboratory

<sup>e</sup>Please specify the test and the results
